# Supplementary material
Source: PubMed Central journal article supplement (PMC6865329)
Supplement: jamacardiol-5-328-s001.pdf [file jamacardiol-5-328-s001.pdf]

1  
2  
3  
4  
5  
6  
7  
8  
9  
10  
11  
12  
13  
14  
15  
16  
17  
18

RESEARCH PROTOCOL

**LOWLANDS SAVES LIVES**

-

*A randomized trial to assess the impact of face-to-face vs. virtual reality training using the Lifesaver VR-app on the quality of cardiopulmonary resuscitation.*

19 **PROTOCOL TITLE:** A randomized trial to assess the impact of face-to-face vs. virtual reality  
20 training using the Lifesaver VR-app on the quality of cardiopulmonary resuscitation.  
21

|                                  |                                                                                                                          |
|----------------------------------|--------------------------------------------------------------------------------------------------------------------------|
| <b>Protocol ID</b>               |                                                                                                                          |
| <b>Short title</b>               | <b>Lowlands saves lives</b>                                                                                              |
| <b>Version</b>                   | <b>1.0</b>                                                                                                               |
| <b>Date</b>                      | <b>22-04-2019</b>                                                                                                        |
| <b>Project leader</b>            | <i>Prof. dr. N van Royen, head of department of cardiology, Radboudumc, Nijmegen</i>                                     |
| <b>Principal investigator(s)</b> | <i>Dr. MA Brouwer, cardiologist<br/>J Nas, MSc, study coordinator<br/>Department of cardiology, Radboudumc, Nijmegen</i> |
| <b>Sponsor</b>                   | <i>Not applicable</i>                                                                                                    |
| <b>Subsidising party</b>         | <i>Not applicable</i>                                                                                                    |
| <b>Independent expert (s)</b>    | <i>Prof. dr. M Edwards<br/>Department of Trauma Surgery, Radboudumc, Nijmegen</i>                                        |
| <b>Laboratory sites</b>          | <i>Not applicable</i>                                                                                                    |
| <b>Pharmacy</b>                  | <i>Not applicable</i>                                                                                                    |

22 **PROTOCOL SIGNATURE SHEET**

23

| <b>Name</b>                                                | <b>Signature</b> | <b>Date</b> |
|------------------------------------------------------------|------------------|-------------|
| <b>Head of Department:</b><br><i>Prof. dr. N van Royen</i> |                  |             |
| <b>Project leader</b><br><i>Prof. dr. N van Royen</i>      |                  |             |
| <b>Study coordinator</b><br><i>J. Nas, MSc</i>             |                  |             |

24

25 **TABLE OF CONTENTS**

26

27 INTRODUCTION AND RATIONALE .....7

28 1. OBJECTIVES..... 8

29 2. STUDY DESIGN ..... 8

30 3. STUDY POPULATION..... 10

31 3.1 Population (base):..... 10

32 Adult (≥18 years) Lowlands-attendees. We expect to recruit approximately 300 participants

33 during the 3 full days of festival-attendance. .... 10

34 3.2 Inclusion criteria ..... 10

35 3.3 Exclusion criteria..... 10

36 4. INVESTIGATIONAL PRODUCT ..... 10

37 4.1 Name and description of investigational product(s) ..... 10

38 4.2 Summary of findings from non-clinical studies..... 11

39 4.3 Summary of findings from clinical studies ..... 11

40 4.4 Summary of known and potential risks and benefits..... 11

41 5. METHODS ..... 11

42 5.1 Study parameters/endpoints ..... 11

43 5.1.1 Main study parameter/endpoint ..... 11

44 5.1.2 Secondary study parameters/endpoints (if applicable) ..... 12

45 5.1.3 Other study parameters (if applicable)..... 12

46 5.2 Randomisation, blinding and treatment allocation ..... 12

47 5.3 Study procedures ..... 12

48 5.4 Withdrawal of individual subjects ..... 12

49 5.5 Replacement of individual subjects after withdrawal ..... 13

50 5.6 Follow-up of subjects withdrawn from treatment..... 13

51 5.7 Premature termination of the study ..... 13

52 6. STATISTICAL ANALYSIS..... 14

53 7. ETHICAL CONSIDERATIONS..... 15

54 7.1 Regulation statement ..... 15

55 7.2 Recruitment and consent ..... 15

56 8. ADMINISTRATIVE ASPECTS, MONITORING AND PUBLICATION ..... 16

57 8.1 Handling and storage of data and documents ..... 16

58 8.2 Monitoring and Quality Assurance ..... 16

59 8.3 Amendments..... 16

60 8.4 Annual progress report ..... 16

61 8.5 Temporary halt and (prematurely) end of study report ..... 16

62 8.6 Public disclosure and publication policy..... 16

63 9. STRUCTURED RISK ANALYSIS ..... 17

64 9.1 Synthesis ..... 17

65 10. REFERENCES ..... 18

66

67

68 **LIST OF ABBREVIATIONS AND RELEVANT DEFINITIONS**

69

- BLS:       Basic life support**
- CPR:       Cardiopulmonary resuscitation**
- OHCA:      Out-of-hospital cardiac arrest**
- VR:        Virtual reality**

70

71 **SUMMARY**

72

73 **Rationale:** In order to optimize survival after out-of-hospital cardiac arrest, basic life support  
74 (BLS) training of lay-person volunteers is essential. It is unknown which training method  
75 results in the highest quality cardiopulmonary resuscitation (CPR).

76 **Objective:** To compare face-to-face CPR training with CPR-training using the Lifesaver  
77 virtual reality (VR) app in terms of quality of CPR.

78 **Study design:** Randomized controlled trial.

79 **Study population:** Adult ( $\geq 18$  years) Lowlands-festival attendees.

80 **Intervention (if applicable):** We will compare face-to-face training with the Lifesaver VR cell  
81 phone application, which is an interactive game than can be used for BLS-training. In the  
82 latter, users 'resuscitate' a victim of cardiac arrest, while wearing VR-glasses showing a  
83 filmed CPR-scenario.

84 **Main study parameters/endpoints:** Following the training, participants will perform CPR on  
85 a certified CPR-training manikin. Main outcome measure is the mean depth and rate of chest  
86 compressions. Secondary outcomes are flow fraction, CPR performance and the proportion  
87 of participants with CPR-parameters within guideline range

88 **Nature and extent of the burden and risks associated with participation, benefit and**  
89 **group relatedness:** All assessments will be made in one visit of approximately 30 minutes.  
90 We will use a questionnaire to assess demographics and previous CPR experience. No  
91 follow-up visits are required. No blood samples or other body material will be collected. The  
92 benefit for the participants is a basic CPR-lesson.

93

94 **INTRODUCTION AND RATIONALE**

95

96 Out-of-hospital cardiac arrest (OHCA) is a major health care problem. <sup>1</sup> In the Netherlands,  
97 about 300 OHCA's occur weekly, of which the average chance of survival is 23%. <sup>2</sup> A  
98 promising development in the care for cardiac arrest victims is the increased involvement of  
99 lay-volunteers in providing cardiopulmonary resuscitation (CPR). High quality bystander CPR  
100 while awaiting professional health care providers markedly increases chances of survival. <sup>3, 4</sup>

101

102 However, in many OHCA's no bystander CPR is performed.<sup>2</sup> In order to increase these  
103 numbers, lay-volunteers should be educated in performing basic life support (BLS). Several  
104 training-methods exist, of which face-to-face is the most common.<sup>5</sup> This comprises schooling  
105 participants in the basic principles of recognizing cardiac arrest, how to notify the emergency  
106 medical services and how to perform CPR. Chest compression training is performed using  
107 certified CPR-manikins.

108

109 A novel method for CPR-training is the Lifesaver app. Lifesaver ([www.life-saver.org.uk](http://www.life-saver.org.uk)) is an  
110 innovative, immersive, and interactive game that can be played for free on smartphones,  
111 tablets or online. The novel 'game-in-film' format provides an engaging learning experience  
112 with real life scenarios and users become actively involved with the resuscitation of a victim  
113 of cardiac arrest. If a wrong decision is made, the user sees the impact but is then able to  
114 rewind and make the correct decision. It was produced by Resuscitation Council (UK) using  
115 charitable funds and generates no financial income.

116

117 At present, only one study on the Lifesaver app has been conducted.<sup>6</sup> This was a  
118 randomized trial, in which it was demonstrated that training using the Lifesaver app can lead  
119 to comparable learning outcomes for several key elements of successful CPR. However, that  
120 study was conducted before the virtual reality (VR) enhancement of the app. The recently  
121 added VR feature allows the users to experience the resuscitation scenario in VR, using  
122 specifically designed VR goggles, further enhancing the experience. In this VR setting, users  
123 perform chest compressions on a pillow. Furthermore, the previous study was conducted in  
124 school children. Thus, data on adults is lacking, but adults are more likely to witness cardiac  
125 arrest and be the first on scene in case of OHCA.

126

127 Therefore, we aim to perform the first randomized trial comparing CPR quality between face-  
128 to-face and Lifesaver VR app CPR training in adults.

129 **1. OBJECTIVES**

130

131 Primary Objective: To compare CPR quality between face-to-face and Lifesaver VR app  
132 CPR-trained adults using a randomized controlled trial.

133

134 **2. STUDY DESIGN**

135

136 We will perform a randomized controlled trial. The present study will be performed during the  
137 Lowlands-festival (August 16-18, 2019). This is an annual music-festival in the Netherlands  
138 with over 50.000 attendees. The present project was selected out of tens of submissions, to  
139 be conducted during Lowlands Science, a section of the festival dedicated exclusively to  
140 performing scientific research.

141

142 All participants will fill-in a questionnaire regarding demographics and previous CPR experi-  
143 ence (appendix 1). As the study will be performed on a musical festival where alcohol con-  
144 sumption is common, and alcohol consumption may impact CPR performance, we will also  
145 perform an alcohol breathalyzer test. In case of an alcohol level  $>0.5\%$ , participants will be  
146 asked to perform a tandem gait test. If they are not able to perform this test, participants will  
147 be excluded from the study. Participants will be asked if they used any other drugs/narcotics  
148 in the 24 hours before participation and will be excluded if they are deemed too intoxicated to  
149 participate. Subsequently, the participants will be randomized into either one of the following  
150 groups:

151

- 152 1. Face-to-face training. A short face-to-face training by a certified BLS-instructor will be  
153 provided.
- 154 2. Lifesaver VR app. Participants will be given a VR-headset running the lifesaver app  
155 and will go through one complete CPR scenario.

156

157 Randomization will be stratified according to alcohol level.

158

159 All participants, from both groups, will perform the training under direct supervision of the  
160 attending experienced instructors.

161

162 Directly following the training, all participants will demonstrate CPR-skills on a certified CPR-  
163 training manikin which will register chest compression parameters (depth, rate etc.). Fur-  
164 thermore, a checklist will be scored regarding the required steps for performing adequate  
165 CPR (appendix 2). The results of these tests will be registered in an anonymised database. If



- 166 a participant provides additional consent, we will make a video recording of the CPR-test.  
167 This will allow for independent, external data review.

168 **3. STUDY POPULATION**

169 **3.1 Population (base):**

170 Adult ( $\geq 18$  years) Lowlands-attendees. No minimum number of participants is required.  
171 Inclusion will continue for the entire Lowlands festival, regardless of the number of  
172 inclusions. We expect to recruit approximately 300 participants during the 3 full days of  
173 festival-attendance. The proportion of participants with previous CPR experience is  
174 capped at 20%.

175  
176 **3.2 Inclusion criteria**

177 In order to be eligible to participate in this study, a subject must meet all of the following  
178 criteria:

- 179 1. Adult ( $\geq 18$  years)
- 180 2. Provide informed consent

181  
182 **3.3 Exclusion criteria**

183 A potential subject who meets any of the following criteria will be excluded from  
184 participation in this study:

- 185 1. Alcohol level  $>0.5\%$  and not able to perform tandem gait test.
- 186 2. For any reason not being able to partake in the face-to-face or VR-app training (e.g.  
187 clear alcohol or drugs intoxication).
- 188 3. For any reason not being able to perform the CPR test on the CPR-manikin (e.g. clear  
189 alcohol or drugs intoxication).

190  
191  
192 **4. INVESTIGATIONAL PRODUCT**

193  
194 **4.1 Name and description of investigational product(s)**

195 *Lifesaver VR app*: Lifesaver ([www.life-saver.org.uk](http://www.life-saver.org.uk)) is an innovative, immersive, and  
196 interactive game that can be played for free on smartphones, tablets or online. The novel  
197 'game-in-film' format provides an engaging learning experience with real life scenarios.  
198 Users become actively involved with the resuscitation of a victim of cardiac arrest and  
199 simulate cardiac compressions by performing compressions on a pillow. If a wrong  
200 decision is made, the user sees the impact but is then able to rewind and make the  
201 correct decision. The recently added VR feature allows the users to experience the  
202 resuscitation scenario in VR, using specifically designed VR goggles, further enhancing

203 the experience. It was produced by Resuscitation Council (UK) using charitable funds and  
204 generates no financial income.

205

#### 206 **4.2 Summary of findings from non-clinical studies**

207 No non-clinical studies have been performed as these are not applicable to this  
208 investigational product.

209

#### 210 **4.3 Summary of findings from clinical studies**

211 Currently, one study has been performed using the Lifesaver app.<sup>6</sup> In that study, 81  
212 children from UK schools were randomized into a group with face-to-face training only,  
213 Lifesaver only or a combination of both. This study demonstrated that the use of Lifesaver  
214 by school children, compared to face-to-face training alone, can lead to comparable  
215 learning outcomes for several key elements of successful CPR. No adverse events were  
216 reported. Data specifically focussing on the Lifesaver VR app is lacking.

217

#### 218 **4.4 Summary of known and potential risks and benefits**

219 *Potential risks:* none. The app was specifically designed for lay-persons by the UK  
220 Resuscitation Council. There are no known potential adverse events associated with the  
221 game. It is increasingly used in UK schools. The game has won several awards, and was  
222 nominated for a BAFTA British Academy Award, in the Children's Interactive Category  
223 ([https://www.elsevier.com/connect/lifesaver-app-teaches-cpr-by-throwing-you-into-the-](https://www.elsevier.com/connect/lifesaver-app-teaches-cpr-by-throwing-you-into-the-action)  
224 [action](https://www.elsevier.com/connect/lifesaver-app-teaches-cpr-by-throwing-you-into-the-action)). Therefore, we feel that the app is safe to use in Lowlands-attendees.

225 *Potential benefits:* acquired basic CPR-skills.

226

### 227 **5. METHODS**

#### 228 **5.1 Study parameters/endpoints**

229 Study endpoints will be assessed using certified CPR manikins and by assessors that are  
230 blinded for the study intervention. A sub-set of the CPR-tests will be reviewed by external,  
231 independent assessors. For this we will use video-recordings, for which we will ask  
232 additional informed consent.

233

##### 234 **5.1.1 Main study parameter/endpoint**

235 Chest compression quality, measured as mean chest compression rate  
236 (compressions per minute) and depth (mm) using a certified CPR-manikin.

237 **5.1.2 Secondary study parameters/endpoints (if applicable)**

238 CPR-score as measured by the CPR-checklist (appendix 2) and flow fraction  
239 (percentage of time where compressions given) measured using a certified CPR-  
240 manikin. CPR-parameters within guideline range, as a binary variable.

241 **5.1.3 Other study parameters (if applicable)**

242 We will collect data on age, sex, weight, educational level, previous CPR experience  
243 and training, use of drugs, and alcohol intake using a breathalyzer alcohol test.

244

245 **5.2 Randomisation, blinding and treatment allocation**

246 Participants will be randomized into one of the two groups using the online CASTOR  
247 data management system. Due to the nature of the intervention, no participant  
248 blinding will be performed. CPR-quality will be measured by certified CPR-manikins  
249 and assessors blinder for study group.

250

251 **5.3 Study procedures**

252 Participants will undergo the following procedures:

- 253 1. Filling in a questionnaire on demographics, drug use and previous CPR  
254 experience and/or training
- 255 2. Alcohol breathalyzer test.
- 256 3. CPR-training using one of the following two methods: face-to-face training, or  
257 training using the Lifesaver VR app.
- 258 4. CPR quality test, to be performed on a certified CPR manikin, under  
259 supervision of one of the assessors. The assessor will also measure the CPR-score  
260 using the CPR-checklist of the European Resuscitation Council course assessments  
261 documents (appendix 2). If a participant provides additional consent, we will make a  
262 video recording of the CPR-test. A random sample of the exams will be reviewed by  
263 an external, independent event committee.

264 We will also ask the participants if they would like to be approached for a follow-up  
265 questionnaire on this subject. This is voluntarily and not obligatory to participate in  
266 this study.

267

268 **5.4 Withdrawal of individual subjects**

269 Subjects can discontinue the study at any time for any reason if they wish to do so  
270 without any consequences.

271

272 **5.5 Replacement of individual subjects after withdrawal**

273 Not applicable.

274

275 **5.6 Follow-up of subjects withdrawn from treatment**

276 No follow-up will be performed in participants withdrawn from the study.

277

278 **5.7 Premature termination of the study**

279 If a participant is unable to complete the CPR-training or CPR-test for any reason,  
280 the participant may be withdrawn from the study. The data gathered until that point  
281 will be used for analyses.

282

283

284 **6. STATISTICAL ANALYSIS**

285

286 Continuous variables will be assessed for normal distribution and reported as means  
287 (standard deviation) or medians (interquartile range), whichever appropriate. Continuous  
288 data will be compared using a student's T-test or Mann-Whitney U test, whichever  
289 appropriate. Categorical variables will be reported as numbers (%) and compared using  
290 chi-squared or pearson exact tests, whichever appropriate.

291 All baseline variables (demographics, previous CPR experience) and outcome data (CPR  
292 rate and depth, CPR-score, flow fraction) variables will also be compared between the  
293 two study groups using the abovementioned tests. In case of confounding variables, we  
294 will correct the comparisons on the outcome measures between the study groups for  
295 these confounders using Analysis of Covariance (ANCOVA).

296 A p-value of <0.05 will be considered statistically significant. Analyses will be performed  
297 using SPSS (IBM SPSS version 25, IBM Corp., Armonk, NY, USA).

298

299 **7. ETHICAL CONSIDERATIONS**

300 **7.1 Regulation statement**

301 The study will be conducted according to the principles of the Declaration of Helsinki  
302 (most recent version established at the 64th WMA General Assembly, Fortaleza, Brazil,  
303 October 2013) and in accordance with the Medical Research Involving Human Subjects  
304 Act (WMO).

305

306 **7.2 Recruitment and consent**

307 All participants will be recruited during the Lowlands festival (August 16-18, 2019). In  
308 case of interest in participating in the study, Lowlands attendees can report to our booth  
309 in the Lowlands Science area. They will then be informed by one of the present research  
310 physicians, trained in the study protocol. The participant will receive a participant  
311 information letter and informed consent form. Subjects have until the end of the festival to  
312 consider their decision and can report back to the booth in case they are willing to  
313 participate. If at any point during the study, participants feel uncomfortable with the CPR-  
314 lessons (face-to-face or VR), they can stop participating in the study. To allow for external  
315 data review, we will ask for additional consent to make a video-recording of the CPR-test.  
316 This is voluntarily and not obligatory to participate in the main study.

317 We will also ask the participants if they would like to be approached for a follow-up  
318 questionnaire on this subject. This is also voluntarily and not obligatory to participate in  
319 the main study.

320 The participant information letter is provided in appendix 3. Participants will be send an  
321 electronic version of the participant information folder if they want to.

322

323

324

325

326 **8. ADMINISTRATIVE ASPECTS, MONITORING AND PUBLICATION**

327 **8.1 Handling and storage of data and documents**

328 When a participant signed for informed consent, a case report form (CRF) number will be  
329 generated and all further documents will be coded with this CRF number, which precludes  
330 directly relating data to individuals. The transcription key is only available to the project  
331 leader and study coordinator and will be protected by a password. All data will be entered  
332 into the eCRF using the Castor database program under their unique identification num-  
333 ber. There is no risk of incidental findings. Data will be stored on a secured location for 15  
334 years. The handling of personal data complies with the EU General Data Protection Regu-  
335 lation and the Dutch Act on Implementation of the General Data Protection Regulation.

337 **8.2 Monitoring and Quality Assurance**

338 Data will be entered in Castor, which has been officially approved for study purposes.

340 **8.3 Amendments**

341 Amendments are changes made to the research after a favourable opinion by the  
342 accredited METC has been given. All amendments will be notified to this METC.

344 **8.4 Annual progress report**

345 Due to the short duration of the study, no annual progress report will be submitted.

347 **8.5 Temporary halt and (prematurely) end of study report**

348 The investigator/sponsor will notify the accredited METC of the end of the study within a  
349 period of 8 weeks. The end of the study is defined as the last participant's last visit.

350 The sponsor will notify the METC immediately of a temporary halt of the study, including  
351 the reason of such an action. In case the study is ended prematurely, the sponsor will  
352 notify the accredited METC within 15 days, including the reasons for the premature  
353 termination. Within one year after the end of the study, the investigator/sponsor will  
354 submit a final study report with the results of the study, including any  
355 publications/abstracts of the study, to the accredited METC.

357 **8.6 Public disclosure and publication policy**

358 The study coordinator and project leader will ensure publication of the data, in close  
359 collaboration with all co-workers in this study.



360 **9. STRUCTURED RISK ANALYSIS**

361

362 **9.1 Synthesis**

363 We will use the Lifesaver VR app for its designated purpose: to educate lay-persons in  
364 performing CPR. Previous studies have not indicated any potential risks, and  
365 demonstrated the feasibility of the product for this purpose. The addition of the VR  
366 functionality is unlikely to alter the risk profile of the app. All training (face-to-face and VR-  
367 training) will be performed under direct supervision of experienced physicians. No  
368 additional procedures are undertaken. Therefore, we feel that participants have no risk of  
369 harm or other adverse events.

370

371

372

373 **10. REFERENCES**

374

375 [1] Atwood C, Eisenberg MS, Herlitz J, Rea TD. Incidence of EMS-treated out-of-hospital cardiac arrest  
376 in Europe. *Resuscitation* 2005;67:75-80.

377 [2] Zijlstra JA, Radstok A, Pijls R, et al. Overleving na een reanimatie buiten het ziekenhuis: vergelijking  
378 van de resultaten van 6 verschillende Nederlands regio's. In: *Reanimatie in Nederland 2016*. Den Haag:  
379 Hartsstichting 2016.

380 [3] Malta Hansen C, Kragholm K, Pearson DA, et al. Association of Bystander and First-Responder  
381 Intervention With Survival After Out-of-Hospital Cardiac Arrest in North Carolina, 2010-2013. *Jama*  
382 2015;314:255-64.

383 [4] Nas J, Thannhauser J, Herrmann JJ, et al. Changes in automated external defibrillator use and  
384 survival after out-of-hospital cardiac arrest in the Nijmegen area. *Neth Heart J* 2018;26:600-05.

385 [5] Perkins GD, Handley AJ, Koster RW, et al. European Resuscitation Council Guidelines for  
386 Resuscitation 2015: Section 2. Adult basic life support and automated external defibrillation.  
387 *Resuscitation* 2015;95:81-99.

388 [6] Yeung J, Kovic I, Vidacic M, et al. The school Lifesavers study-A randomised controlled trial  
389 comparing the impact of Lifesaver only, face-to-face training only, and Lifesaver with face-to-face  
390 training on CPR knowledge, skills and attitudes in UK school children. *Resuscitation* 2017;120:138-45.

391

392

393 **APPENDIX 1**            **QUESTIONNAIRES**  
394  
395

396 *Vragenlijst voor proefpersonen (Nederlands)*

|                                                                            |                                                                                                                                                                                                                                                                                  |  |
|----------------------------------------------------------------------------|----------------------------------------------------------------------------------------------------------------------------------------------------------------------------------------------------------------------------------------------------------------------------------|--|
| Studie nummer & instructeur<br>(in te vullen door onderzoeker)             |                                                                                                                                                                                                                                                                                  |  |
| E-mail adres *                                                             |                                                                                                                                                                                                                                                                                  |  |
| Geslacht                                                                   | <input type="radio"/> Vrouw<br><input type="radio"/> Man<br><input type="radio"/> Wenst deze informatie niet te delen                                                                                                                                                            |  |
| Leeftijd                                                                   |                                                                                                                                                                                                                                                                                  |  |
| Gewicht                                                                    |                                                                                                                                                                                                                                                                                  |  |
| Hoogst genoten opleiding                                                   | <input type="radio"/> Basisonderwijs<br><input type="radio"/> Middelbaar onderwijs<br><input type="radio"/> MBO<br><input type="radio"/> HBO<br><input type="radio"/> WO                                                                                                         |  |
| Beroep in de zorg                                                          | <input type="radio"/> Ja<br><input type="radio"/> Nee                                                                                                                                                                                                                            |  |
| Heeft u, buiten alcohol, de afgelopen 24 uur verdovende middelen gebruikt? | <input type="radio"/> Ja, welke:<br><input type="radio"/> Nee<br><input type="radio"/> Wenst deze informatie niet te delen                                                                                                                                                       |  |
| <i>Ervaring met reanimatie</i>                                             |                                                                                                                                                                                                                                                                                  |  |
| Reanimatie cursus                                                          | <input type="radio"/> Nee<br><input type="radio"/> Ja, welk niveau:<br><input type="radio"/> De Lifesaver app<br><input type="radio"/> BLS<br><input type="radio"/> BLS+AED<br><input type="radio"/> ALS<br><input type="radio"/> Anders, namelijk:<br><br>Datum laatste cursus: |  |
| Reanimatie meegemaakt                                                      | <input type="radio"/> Nee<br><input type="radio"/> Ja, ... keer<br><input type="radio"/> Enkel ooggetuige<br><input type="radio"/> Mee gereanimeerd als leek<br><input type="radio"/> Mee gereanimeerd als professional                                                          |  |
| Het slachtoffer was een<br>(kies een of beide)                             | <input type="radio"/> Onbekende<br><input type="radio"/> Familielid of bekend                                                                                                                                                                                                    |  |

397 \* Als u benaderd wil worden voor een vervolg vragenlijst of als u de informatie digitaal wil  
 398 ontvangen.

399 Questionnaire for study participants (English)

|                                                                          |                                                                                                                                                                                                                                              |  |
|--------------------------------------------------------------------------|----------------------------------------------------------------------------------------------------------------------------------------------------------------------------------------------------------------------------------------------|--|
| Study number & instructor<br>(to be completed by investigator)           |                                                                                                                                                                                                                                              |  |
| E-mail address*                                                          |                                                                                                                                                                                                                                              |  |
| Sex                                                                      | <input type="radio"/> Female<br><input type="radio"/> Male<br><input type="radio"/> Do not wish to disclose                                                                                                                                  |  |
| Age                                                                      |                                                                                                                                                                                                                                              |  |
| Weight                                                                   |                                                                                                                                                                                                                                              |  |
| Highest level of education                                               | <input type="radio"/> Primary education<br><input type="radio"/> Secondary education<br><input type="radio"/> Short cycle tertiary education<br><input type="radio"/> Bachelor or equivalent<br><input type="radio"/> Master or equivalent   |  |
| Healthcare professional                                                  | <input type="radio"/> Yes<br><input type="radio"/> No                                                                                                                                                                                        |  |
| Have you used any drugs/narcotics in the past 24 hours, besides alcohol? | <input type="radio"/> Yes, which:<br><input type="radio"/> No<br><input type="radio"/> Do not wish to disclose                                                                                                                               |  |
| <i>Previous CPR experience</i>                                           |                                                                                                                                                                                                                                              |  |
| CPR course                                                               | <input type="radio"/> No<br><input type="radio"/> Yes, which level<br><input type="radio"/> BLS<br><input type="radio"/> BLS+AED<br><input type="radio"/> ALS<br><input type="radio"/> Other:<br><br>Date last course:                       |  |
| Witnessed a cardiac arrest                                               | <input type="radio"/> No<br><input type="radio"/> Yes, ... times<br><input type="radio"/> Only as a witness<br><input type="radio"/> CPR performed as bystander/lay-person<br><input type="radio"/> CPR performed as healthcare professional |  |
| The victim was                                                           | <input type="radio"/> A stranger<br><input type="radio"/> A relative or other acquaintance                                                                                                                                                   |  |

400  
 401 \* If you want to be approached for a follow-up study or receive the information digitally  
 402

403  
404  
405

**APPENDIX 2 CPR SKILL ASSESSMENT TEST**  
(European Resuscitation Council CPR/AED course assessment document)

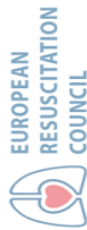

2016.V2

**BLS assessment record**

Candidate Name:

Date:

Instructor:

| Skill                              | The candidate                                                                                                                                                | Achieved |    | Comments |
|------------------------------------|--------------------------------------------------------------------------------------------------------------------------------------------------------------|----------|----|----------|
|                                    |                                                                                                                                                              | Yes      | No |          |
| Check response                     | Demonstrates gently shaking and shouting to establish responsiveness                                                                                         |          |    |          |
| Assess breathing                   | Demonstrates head tilt and chin lift                                                                                                                         |          |    |          |
| Assess breathing                   | Demonstrates look, listen and feel for normal breathing for no more than 10 sec (does not count aloud)                                                       |          |    |          |
| Call emergency services (Get help) | Describes how to phone for emergency services: 112, unresponsive and non-breathing victim, AED                                                               |          |    |          |
| Chest compressions                 | Demonstrates effective chest compressions; rate 100-120/min, depth 5-6 cm; hand position: centre of the chest. Minimises interruptions in chest compressions |          |    |          |
| Rescue breaths                     | Demonstrates rescue breaths sufficient to cause the chest to rise and fall                                                                                   |          |    |          |
| Compression : ventilation ratio    | Demonstrates ratio of 30 compressions to 2 ventilations                                                                                                      |          |    |          |
| Activate AED                       | Switch the AED on or, if a helper is present, ask him/her to do it                                                                                           |          |    |          |
| Attach pads                        | Demonstrates attaching pads in correct position                                                                                                              |          |    |          |
| Stand clear                        | Allows rhythm analysis whilst making sure that nobody touches the victim (including visual sweep and verbal instruction)                                     |          |    |          |
| Deliver shock                      | Demonstrates rapid and safe delivery of a shock (including visual sweep and verbal instruction to stand clear)                                               |          |    |          |
| Follow AED instructions            | Demonstrates listening to and executing AED instructions                                                                                                     |          |    |          |
| CPR                                | Minimises interruptions in chest compressions and demonstrates correct sequence in ratio of 30 compressions to 2 ventilations                                |          |    |          |

406  
407  
408  
409  
410

|     |                    |                                               |
|-----|--------------------|-----------------------------------------------|
| 411 | <b>APPENDIX 3a</b> | <b>PARTICIPANT INFORMATION FOLDER (DUTCH)</b> |
| 412 |                    |                                               |

413 **Kwaliteit van reanimatie na training door een instructeur vergeleken met training met een**  
414 **virtual reality app**

415 (Lowlands saves Lives - A randomized trial to assess the impact of face-to-face vs. virtual reality  
416 training using the Lifesaver VR-app on the quality of cardiopulmonary resuscitation)

417

418 **Inleiding**

419 Wij vragen u om mee te doen aan een medisch-wetenschappelijk onderzoek. Meedoen is vrijwillig.  
420 Om mee te doen is wel uw schriftelijke toestemming nodig. Voordat u beslist of u wilt meedoen aan dit  
421 onderzoek, krijgt u uitleg over wat het onderzoek inhoudt. Lees deze informatie rustig door en vraag  
422 de onderzoeker uitleg als u vragen heeft.

423

424 **1. Algemene informatie en doel van het onderzoek**

425 Wekelijks krijgen er in Nederland 300 mensen een hartstilstand. De gemiddelde overlevingskans is  
426 23%. Die kans wordt groter als er wordt gestart met reanimeren voordat de ambulance aanwezig is.  
427 Helaas gebeurt dit niet altijd, omdat de omstanders vaak niet kunnen reanimeren. Om dit probleem  
428 aan te pakken, is het nodig om meer mensen te leren reanimeren. Dit kan op verschillende manieren.  
429 De meest gangbare manier is door een reanimatietraining te volgen bij een instructeur. Een andere  
430 manier is door gebruik te maken van de smartphone-app "Lifesaver". Dit is een app die speciaal is  
431 ontwikkeld om te leren reanimeren. Het is onbekend welke manier van les geven leidt tot de beste  
432 kwaliteit van reanimatie. Daarom hebben we dit onderzoek opgezet.

433

434 Wij willen onderzoeken welke vorm van reanimatietraining leidt tot de beste kwaliteit van reanimatie:  
435 les door een instructeur, of les met een reanimatie-app. Dit onderzoek wordt uitgevoerd tijdens het  
436 Lowlands-festival en deelname duurt ongeveer 15 minuten. We verwachten 300 deelnemers. Dit  
437 onderzoek is beoordeeld door ethische adviescommissie van het Radboudumc, Nijmegen.

438

439 **2. Wat meedoen inhoudt**

440 Als u meedoet vragen we u om een korte vragenlijst in te vullen. Hierop vragen we onder andere naar  
441 uw leeftijd en gewicht en naar voorgaande ervaring met reanimatie. Omdat het gebruik van alcohol de  
442 reanimatiekwaliteit kan beïnvloeden, willen we uw alcoholpromillage meten met een alcohol ademtest.  
443 Als het alcoholpromillage  $>0.5\%$  is, vragen we u om over een touwtje te lopen om te testen of u in  
444 staat bent om te reanimeren. Ook vragen we naar drugsgebruik in de afgelopen 24 uur. Vervolgens  
445 wordt u door middel van een loting ingedeeld in een van de twee groepen:

446

- 447 1. Reanimatieles door een instructeur.
- 448 2. Reanimatieles door middel van de Lifesaver virtual reality app, waarbij u een realistisch  
449 reanimatie-scenario doorloopt met een virtual reality bril.

450 Na het doorlopen van de reanimatieles legt u een reanimatietest af. De test bestaat uit een korte  
451 reanimatie op een speciale reanimatiepop. De pop registreert de kwaliteit van de reanimatie. Een  
452 onderzoeker houdt ook een score bij door middel van een checklist. Indien u daar apart toestemming



453 voor geeft, zullen we het examen opnemen op video. Daardoor kan een externe beoordelaar het  
454 examen nog eens nakijken. Hierna is het onderzoek afgelopen. Er zijn geen risico's verbonden aan  
455 deelname. U krijgt voor deelname geen officieel reanimatiecertificaat, omdat de tijd te kort is om een  
456 hele cursus te verzorgen. Als u wil deelnemen aan een vervolgvragenlijst, kunt u uw e-mail adres  
457 achterlaten. Dit is optioneel.

458

### 459 **3. Als u niet wilt meedoen en/of wilt stoppen met het onderzoek**

460 U beslist zelf of u meedoet aan het onderzoek, deelname is vrijwillig. U kunt op elk moment stoppen  
461 met deelname aan het onderzoek. Uw deelname stopt als u zelf kiest om te stoppen of als alle  
462 metingen gedaan zijn. Het hele onderzoek is afgelopen als alle deelnemers klaar zijn.

463

### 464 **4. Gebruik en bewaren van uw gegevens**

465 Voor dit onderzoek worden uw persoonsgegevens verzameld, gebruikt en bewaard. Het gaat om  
466 gegevens zoals uw leeftijd, gewicht en, indien u benaderd wil worden voor vervolgonderzoek, uw e-  
467 mailadres. Indien u daar apart toestemming voor geeft, maken we video-opnames van de  
468 reanimatietest. Het verzamelen, gebruiken en bewaren van uw gegevens is nodig om de vragen die in  
469 dit onderzoek worden gesteld te kunnen beantwoorden en de resultaten te kunnen publiceren. Wij  
470 vragen voor het gebruik van uw gegevens uw toestemming. Een uitgebreide tekst over het gebruiken  
471 en bewaren van uw gegevens vindt u in Bijlage 1. Dit onderzoek voldoet aan de Algemene  
472 verordening gegevensbescherming (AVG)

473

### 474 **5. Heeft u vragen?**

475 Bij vragen kunt u contact opnemen met het onderzoeksteam. De hoofdonderzoekers zijn J Nas en dr.  
476 MA Brouwer. Zij zijn aanwezig op het Lowlands festival en telefonisch bereikbaar via 024-3616785  
477 (buiten kantooruren op 0621195438). De onafhankelijke arts voor dit onderzoek is prof. dr. Michael  
478 Edwards, traumachirurg, bereikbaar op 024-3613871. Bij problemen of klachten met betrekking tot dit  
479 onderzoek, die u niet met het onderzoeksteam kunt bespreken, kunt u contact opnemen met de  
480 Klachtencommissie van het Radboudumc, op telefoonnummer: 024-3613191.

481

### 482 **6. Ondertekening toestemmingsformulier**

483 Wanneer u voldoende bedenktijd heeft gehad, wordt u gevraagd te beslissen over deelname aan dit  
484 onderzoek. Indien u toestemming geeft, vragen wij u dat op de bijbehorende toestemmingsverklaring  
485 schriftelijk te bevestigen. Door uw schriftelijke toestemming geeft u aan dat u de informatie heeft  
486 begrepen en instemt met deelname aan het onderzoek. Het handtekeningblad wordt door de  
487 onderzoeker bewaard. Zowel uzelf als de onderzoeker ontvangen een getekende versie van deze  
488 toestemmingsverklaring.

489

490 **Bijlage 1: Gebruik en bewaren van uw gegevens**

491  
492 **Kwaliteit van reanimatie na training door een instructeur vergeleken met training met een**  
493 **virtual reality app**

494 Voor dit onderzoek worden uw persoonsgegevens verzameld, gebruikt en bewaard. Het gaat om  
495 gegevens zoals uw geboortedatum, e-mail adres en om gegevens over uw gezondheid. Het  
496 verzamelen, gebruiken en bewaren van uw gegevens is nodig om de vragen die in dit onderzoek  
497 worden gesteld te kunnen beantwoorden en de resultaten te kunnen publiceren. Wij vragen voor het  
498 gebruik van uw gegevens.

499  
500 **Vertrouwelijkheid van uw gegevens**

501 Om uw privacy te beschermen krijgen uw gegevens een code. Uw e-mail adres en andere gegevens  
502 die u direct kunnen identificeren worden daarbij weggelaten. Alleen met de sleutel van de code zijn  
503 gegevens tot u te herleiden. De sleutel van de code blijft veilig opgeborgen in de lokale  
504 onderzoeksinstelling. De gegevens die naar de opdrachtgever worden gestuurd bevatten alleen de  
505 code, maar niet uw naam of andere gegevens waarmee u kunt worden geïdentificeerd. Ook in  
506 rapporten en publicaties over het onderzoek zijn de gegevens niet tot u te herleiden.

507  
508 **Toegang tot uw gegevens voor controle**

509 Sommige personen kunnen op de onderzoekslocatie toegang krijgen tot al uw gegevens. Ook tot de  
510 gegevens zonder code. Dit is nodig om te kunnen controleren of het onderzoek goed en betrouwbaar  
511 is uitgevoerd. Personen die ter controle inzage krijgen in uw gegevens zijn het team van Lowlands  
512 Saves Lives, een externe instantie die de gegevens controleert en nationale en toezichhoudende  
513 autoriteiten, bijvoorbeeld de Inspectie Gezondheidszorg en Jeugd. De video-opnames worden door  
514 externe beoordelaars bekeken. Hierna worden de video-opnames bewaard op een beveiligde locatie.  
515 Alle betrokken partijen houden uw gegevens geheim. Wij vragen u voor deze inzage toestemming te  
516 geven.

517  
518 **Bewaartermijn gegevens**

519 Uw gegevens moeten 15 jaar worden bewaard op de onderzoekslocatie.

520  
521 **Intrekken toestemming**

522 U kunt uw toestemming voor gebruik van uw persoonsgegevens altijd weer intrekken. De  
523 onderzoeksgegevens die zijn verzameld tot het moment dat u uw toestemming intrekt worden nog wel  
524 gebruikt in het onderzoek.

525  
526 **Meer informatie over uw rechten bij verwerking van gegevens**

527 Voor algemene informatie over uw rechten bij verwerking van uw persoonsgegevens kunt u de  
528 website van de Autoriteit Persoonsgegevens raadplegen. Bij vragen over uw rechten kunt u contact  
529 opnemen met de verantwoordelijke voor de verwerking van uw persoonsgegevens. Voor dit  
530 onderzoek is dat het Radboudumc, afdeling cardiologie. Telefoonnummer 024-3616785.

531  
532 Bij vragen of klachten over de verwerking van uw persoonsgegevens raden we u aan eerst contact op  
533 te nemen met de onderzoekslocatie. U kunt ook contact opnemen met de Functionaris voor de  
534 Gegevensbescherming van het Radboudumc ([gegevensbescherming@radboudumc.nl](mailto:gegevensbescherming@radboudumc.nl)) of de Autoriteit  
535 Persoonsgegevens.

536

537 **Bijlage 2: toestemmingsformulier deelnemer**

538 **Kwaliteit van reanimatie na training door een instructeur vergeleken met training met een**  
539 **virtual reality app**

- 540 - Ik heb de informatiebrief gelezen. Ook kon ik vragen stellen. Mijn vragen zijn voldoende  
541 beantwoord. Ik had genoeg tijd om te beslissen of ik meedoe.
- 542 - Ik weet dat meedoen vrijwillig is. Ook weet ik dat ik op ieder moment kan beslissen om toch niet  
543 mee te doen of te stoppen met het onderzoek. Daarvoor hoef ik geen reden te geven.
- 544 - Ik geef toestemming voor het verzamelen en gebruiken van mijn gegevens voor de beantwoording  
545 van de onderzoeksvraag in dit onderzoek.
- 546 - Ik weet dat voor de controle van het onderzoek sommige mensen toegang tot al mijn gegevens  
547 kunnen krijgen. Die mensen staan vermeld in deze informatiebrief. Ik geef toestemming voor die  
548 inzage door deze personen.
- 549 - Ik geef  **wel**  
550  **geen** toestemming om mij na dit onderzoek te benaderen voor een vervolg  
551 vragenlijst over dit onderwerp
- 552
- 553 - Ik geef  **wel**  
554  **geen** toestemming om beelden van de reanimatie-test op te nemen met een  
555 videorecorder voor externe beoordeling

556  
557 Ik wil meedoen aan dit onderzoek.

558  
559 Naam deelnemer:

560

561

562 Handtekening: Datum : \_\_ / \_\_ / \_\_

563 -----

564

565 Ik verklaar dat ik deze deelnemer volledig heb geïnformeerd over het genoemde onderzoek.

566

567 Als er tijdens het onderzoek informatie bekend wordt die de toestemming van de deelnemer zou  
568 kunnen beïnvloeden, dan breng ik hem/haar daarvan tijdig op de hoogte.

569

570 Naam onderzoeker (of diens vertegenwoordiger):

571

572

573 Handtekening: Datum: \_\_ / \_\_ / \_\_

574 -----

575 **Quality of resuscitation after training by an instructor compared to training with**  
576 **a virtual reality app**

577 (Lowlands saves Lives: A randomized trial to assess the impact of face-to-face vs. virtual reality  
578 training using the Lifesaver VR-app on the quality of cardiopulmonary resuscitation.)

579

580 **Introduction**

581 Dear sir/madam,

582 We ask you to participate in a medical-scientific study. Participation is voluntary. Participation requires  
583 your written consent. Before you decide whether you want to participate in this study, you will be given  
584 an explanation about what the study involves. Please read this information carefully and ask the  
585 investigator for an explanation if you have any questions.

586

587 **1. General information and purpose of the study**

588 Weekly, 300 persons experience a cardiac arrest in the Netherlands. The average chances of survival  
589 are 23%. This chance increases if cardiopulmonary resuscitation (CPR) is initiated before ambulance  
590 arrival. Unfortunately, this not always happens, as bystanders often do not know how to perform CPR.  
591 To address this issue, it is necessary to educate more people in performing CPR. This can be done in  
592 several ways. The most common way is by attending a course with an instructor. Another way is to  
593 use the smartphone-app "Lifesaver". This is an app that has been specifically developed to learn how  
594 to perform CPR. It is unknown which form of training results in the highest quality CPR. Therefore, we  
595 initiated this study.

596

597 We want to investigate which form of CPR-training leads to the highest quality CPR: CPR-training by  
598 an instructor, or CPR-training using a CPR-app. This study will be performed during the Lowlands-  
599 festival and participation will take about 15 minutes. We expect 300 participants. The Medical  
600 Research Ethics Committee of the Radboudumc has approved this study.

601

602 **2. What participation involves**

603 If you participate in this study, you are asked to fill in a short questionnaire. This comprises questions  
604 about your age and weight and previous CPR experience. As the use of alcohol may impact the  
605 quality of CPR, we want to measure your alcohol level using a breathalyzer test. If the alcohol level is  
606  $>0.5\%$ , you will be asked to walk over a rope to test if you are able to perform CPR. We will also ask  
607 you about any drug use in the past 24 hours. Subsequently, you will be randomly allocated to one of  
608 the following two groups:

609

- 610 1. CPR-training by an instructor
- 611 2. CPR-training using the Lifesaver virtual reality app, in which you will go through a realistic  
612 CPR-scenario using virtual reality goggles.

613

614 After completing the CPR-training you will take a CPR-test. This test consists of shortly performing  
615 CPR on a designated resuscitation-manikin. This manikin will register the quality of the chest

616 compressions. A researcher will also keep score of your performance using a checklist. If you give  
617 separate permission, we will make a video recording of the post-training test. This will allow an  
618 external assessor to review the exam. After this test, the study is completed. There are no follow-up  
619 measurements. There are no risks involved in your participation. You will not receive an official CPR-  
620 certificate, because the time is too short to provide a complete CPR-course. If you want to participate  
621 in a follow-up questionnaire, you can leave your e-mail address. This is optional.

622

### 623 **3. If you do not want to participate and/or stop participating in the study**

624 You decide whether or not to participate in the study. Participation is voluntary. You can decide to stop  
625 participating in the study at any point. Your participation in the study ends if you choose to stop or if all  
626 measurements have been completed. The study is concluded once all the participants have completed  
627 the study.

628

### 629 **5. Usage and storage of your data**

630 Your personal data will be collected, used and stored for this study. This concerns data such as your  
631 age, weight and, in case you want to participate in a follow-up study, your e-mail address. If you give  
632 separate permission, we will make video-recordings of the CPR-test. The collection, use and storage  
633 of your data is required to answer the questions asked in this study and to publish the results. We ask  
634 your permission for the use of your data. An extensive text on the usage and storage of your data can  
635 be found in Appendix 1. This study complies with the General Data Protection Regulation.

636

### 637 **6. Do you have any questions?**

638 In case of any questions you can contact the study team. The principal investigators are J Nas and dr.  
639 MA Brouwer. Both researchers are present at the Lowlands festival and can be reached by phone on  
640 024-3616785 (outside office hours on 0621195438). The independent expert is prof. dr. Michael Ed-  
641 wards, trauma surgeon, who can be reached on 024-3613871. In case of any problems or complaints  
642 regarding the study, that you can not discuss with the study team, you can contact the Complaints  
643 Committee of the Radboudumc (024-3613191)

644

### 645 **7. Signing the consent form**

646 When you have had sufficient time for reflection, you will be asked to decide on participation in this  
647 study. If you give permission, we will ask you to confirm this in writing on the appended consent form.  
648 By your written permission you indicate that you have understood the information and consent to  
649 participation in the study. Yourself and the investigator will receive a signed copy of the consent form.

650

651

652 **Appendix 1: Usage and storage of your data**

653

654 **Quality of resuscitation after training by an instructor compared to training with a virtual reality**  
655 **app**

656

657 Your personal will be collected, used and stored for this study. This concerns data such as your age,  
658 weight and, in case you want to participate in a follow-up study, your e-mail address. The collection,  
659 use and storage of your is required to answer the questions asked in this study and to publish the  
660 results. We ask your permission for the use of your data.

661

662 **Confidentiality of your data**

663 To protect your privacy, your data will be given a code. Your name and other information that can  
664 directly identify you, will be omitted. Data can only be traced back to you with the encryption key. The  
665 encryption key remains safely stored in the local research institute. The data that will be used for  
666 analyses will only contain the code, not your name or other data with which you can be identified. The  
667 data cannot be traced back to you in reports and publications about the study.

668

669 **Access to your data for verification**

670 Some people can access all your data at the research location. Including the data without a code. This  
671 is necessary to check whether the study is being conducted in a good and reliable manner. Persons  
672 who have access to your data for review are the team of Lowlands Saves Lives, an external party that  
673 checks the data and national authorities, for example, the Healthcare and Youth Inspectorate. The  
674 video recordings will be review by external assessors. Afterwards, the recordings will be stored on a  
675 safe location. All parties involved will keep your data confidential. We ask you to consent to this  
676 access.

677

678 **Retention period of your data**

679 Your data must be kept for 15 years at the research location.

680

681 **Withdrawing consent**

682 You can withdraw your consent to the use of your personal data at any time. The study data collected  
683 until the moment you withdraw your consent will still be used in the study.

684

685 **More information about your rights when processing data**

686 For general information about your rights when processing your personal data, you can consult the  
687 website of the Dutch Data Protection Authority. If you have questions about your rights, please contact  
688 the person responsible for the processing of your personal data. For this study, that is the  
689 Radboudumc, department of cardiology. Telephone number 024-3616785.

690

691 If you have questions or complaints about the processing of your personal data, we advise you to first  
692 contact the research location. You can also contact the Data Protection Officer of the institution  
693 ([gegevensbescherming@radboudumc.nl](mailto:gegevensbescherming@radboudumc.nl)) or the Dutch Data Protection Authority.

694

695

696 **Appendix 2: Subject Consent Form**

697

698 **Quality of resuscitation after training by an instructor compared to training with a virtual reality**  
699 **app**

700

701 - I have read the subject information form. I was also able to ask questions. My questions have  
702 been answered to my satisfaction. I had enough time to decide whether to participate.

703 - I know that participation is voluntary. I know that I may decide at any time not to participate after  
704 all or to withdraw from the study. I do not need to give a reason for this.

705 - I give permission for the collection and use of my data to answer the research question in this  
706 study.

707 - I know that some people may have access to all my data to verify the study. These people are  
708 listed in this information sheet. I consent to the inspection by them.

709 - I  **do**

710  **do not** give consent to approach me for a follow-up questionnaire on this subject

711

712 - I  **do**

713  **do not** give consent to make a video-recording of the CPR-test for external review

714

715 - I want to participate in this study

716

717 Name of study subject:

718

719 Signature: \_\_\_\_\_ Date: \_\_ / \_\_ / \_\_

720 -----

721

722 I hereby declare that I have fully informed this study subject about this study.

723

724 If information comes to light during the course of the study that could affect the study subject's  
725 consent, I will inform him/her of this in a timely fashion.

726

727 Name of investigator (or his/her representative):

728

729

730 Signature: \_\_\_\_\_ Date: \_\_ / \_\_ / \_\_

731 -----

732
