# Supplementary material
Source: PubMed Central journal article supplement (PMC6865329)
Supplement: jamacardiol-5-328-s003.pdf [file jamacardiol-5-328-s003.pdf]

# Data Sharing Statement

Nas. Effect of Face-to-Face vs Virtual Reality Training on Cardiopulmonary Resuscitation Quality. *JAMA Cardiol.* Published November 17, 2019. 10.1001/jamacardio.2019.4992

## Data

**Data available:** Yes

**Data types:** Deidentified participant data

**How to access data:** [j.nas@radboudumc.nl](mailto:j.nas@radboudumc.nl)

**When available:** beginning date: 01-01-2020, end date: 12-31-2020

## Supporting Documents

**Document types:** None

## Additional Information

**Who can access the data:** Researchers whose proposed use of the data has been approved

**Types of analyses:** Analyses that complement the trials' objective.

**Mechanisms of data availability:** After approval of a proposal and with investigator support.
